# Supplementary material for: An Online Experiment of NHS Information Framing on Mothers’ Vaccination Intention of Children against COVID-19
Source: MDPI journal article supplement (doi:10.3390/vaccines10050720), 2022-05-04
Supplement: s1 [file s1]

## Supplementary Materials

**Table S1.** Descriptive Statistics for DV: Vaccine Confidence Index (VCI) by IV1: risk frame and IV2: disease type.

| Descriptives            |                          |                       |       |
|-------------------------|--------------------------|-----------------------|-------|
|                         | Treatment Disease String | Treatment Risk String | VCI   |
| N                       | Covid                    | Child                 | 127   |
|                         |                          | Community             | 137   |
|                         | Flu                      | Child                 | 150   |
|                         |                          | Community             | 128   |
| Mean                    | Covid                    | Child                 | 18.4  |
|                         |                          | Community             | 17.7  |
|                         | Flu                      | Child                 | 18.8  |
|                         |                          | Community             | 18.2  |
| Std. error mean         | Covid                    | Child                 | 0.259 |
|                         |                          | Community             | 0.296 |
|                         | Flu                      | Child                 | 0.263 |
|                         |                          | Community             | 0.351 |
| 95% CI mean lower bound | Covid                    | Child                 | 17.8  |
|                         |                          | Community             | 17.1  |
|                         | Flu                      | Child                 | 18.3  |
|                         |                          | Community             | 17.5  |
| 95% CI mean upper bound | Covid                    | Child                 | 18.9  |
|                         |                          | Community             | 18.3  |
|                         | Flu                      | Child                 | 19.3  |
|                         |                          | Community             | 18.9  |
| Standard deviation      | Covid                    | Child                 | 2.92  |
|                         |                          | Community             | 3.47  |
|                         | Flu                      | Child                 | 3.22  |
|                         |                          | Community             | 3.97  |

**Table S2.** Descriptive Statistics for the DV: 4C (Calculation, Collective Responsibility, Complacency, Confidence) by IV1: risk frame and IV2: disease type.

| Descriptives            |                          |                       |       |
|-------------------------|--------------------------|-----------------------|-------|
|                         | Treatment Disease String | Treatment Risk String | 4C    |
| N                       | Covid                    | Child                 | 127   |
|                         |                          | Community             | 137   |
|                         | Flu                      | Child                 | 150   |
|                         |                          | Community             | 128   |
| Mean                    | Covid                    | Child                 | 45.7  |
|                         |                          | Community             | 44.5  |
|                         | Flu                      | Child                 | 47.6  |
|                         |                          | Community             | 45.7  |
| Std. error mean         | Covid                    | Child                 | 0.821 |
|                         |                          | Community             | 0.799 |
|                         | Flu                      | Child                 | 0.749 |
|                         |                          | Community             | 0.916 |
| 95% CI mean lower bound | Covid                    | Child                 | 44.1  |
|                         |                          | Community             | 42.9  |
|                         | Flu                      | Child                 | 46.2  |
|                         |                          | Community             | 43.9  |
| 95% CI mean upper bound | Covid                    | Child                 | 47.3  |
|                         |                          | Community             | 46.0  |
|                         | Flu                      | Child                 | 49.1  |
|                         |                          | Community             | 47.5  |
| Standard deviation      | Covid                    | Child                 | 9.25  |
|                         |                          | Community             | 9.35  |
|                         | Flu                      | Child                 | 9.17  |
|                         |                          | Community             | 10.4  |
